# Supplementary material for: A Simple in situ Assay to Assess Plant-Associative Bacterial Nitrogenase Activity
Source: Front Microbiol. 2021 Jun 23;12:690439. doi: 10.3389/fmicb.2021.690439 (PMC8261070; doi:10.3389/fmicb.2021.690439)
Supplement: Supplementary File 1 — Template for calculating C2H4 production and nitrogenase activity from GC output. [file Data_Sheet_1.xlsx]

## Sheet: Sheet1
Treatment	Replicate	Time (h)	Ethylene (%)	Acetylene (%)	fraction	C2H2 added (%)	Assay volume (mL)	Starting nmoles C2H2	nmoles C2H4 present per plant	nmoles C2H4 per h
a	1	24			#DIV/0!	10	130	531371	#DIV/0!	#DIV/0!
a	1	48			#DIV/0!	10	130	531371	#DIV/0!
a	1	72			#DIV/0!	10	130	531371	#DIV/0!
a	2	24			#DIV/0!	10	130	531371	#DIV/0!	#DIV/0!
a	2	48			#DIV/0!	10	130	531371	#DIV/0!
a	2	72			#DIV/0!	10	130	531371	#DIV/0!
a	3	24			#DIV/0!	10	130	531371	#DIV/0!	#DIV/0!
a	3	48			#DIV/0!	10	130	531371	#DIV/0!
a	3	72			#DIV/0!	10	130	531371	#DIV/0!
a	4	24			#DIV/0!	10	130	531371	#DIV/0!	#DIV/0!
a	4	48			#DIV/0!	10	130	531371	#DIV/0!
a	4	72			#DIV/0!	10	130	531371	#DIV/0!
a	5	24			#DIV/0!	10	130	531371	#DIV/0!	#DIV/0!
a	5	48			#DIV/0!	10	130	531371	#DIV/0!
a	5	72			#DIV/0!	10	130	531371	#DIV/0!
									Mean rate	#DIV/0!
									SD	#DIV/0!
									SE	#DIV/0!
b	1	24			#DIV/0!	10	130	531371	#DIV/0!	#DIV/0!
b	1	48			#DIV/0!	10	130	531371	#DIV/0!
b	1	72			#DIV/0!	10	130	531371	#DIV/0!
b	2	24			#DIV/0!	10	130	531371	#DIV/0!	#DIV/0!
b	2	48			#DIV/0!	10	130	531371	#DIV/0!
b	2	72			#DIV/0!	10	130	531371	#DIV/0!
b	3	24			#DIV/0!	10	130	531371	#DIV/0!	#DIV/0!
b	3	48			#DIV/0!	10	130	531371	#DIV/0!
b	3	72			#DIV/0!	10	130	531371	#DIV/0!
b	4	24			#DIV/0!	10	130	531371	#DIV/0!	#DIV/0!
b	4	48			#DIV/0!	10	130	531371	#DIV/0!
b	4	72			#DIV/0!	10	130	531371	#DIV/0!
b	5	24			#DIV/0!	10	130	531371	#DIV/0!	#DIV/0!
b	5	48			#DIV/0!	10	130	531371	#DIV/0!
b	5	72			#DIV/0!	10	130	531371	#DIV/0!
									Mean rate	#DIV/0!
									SD	#DIV/0!
									SE	#DIV/0!
